# Supplementary material for: Molecular and Physiological Mechanisms of Tea (Camellia sinensis (L.) O. Kuntze) Leaf and Root in Response to Nitrogen Deficiency
Source: Research Square preprint supplement (doi:10.21203/rs.3.rs-1743521/v1), 2022-07-01
Supplement: Supplementary file 1 [file 2233b31b374f1a6c9a1aae96.xlsx]

## Sheet: Sheet1
Table S7. Enriched GO terms of DEGs in tea roots under N deficiency.
Gene_id	log2(Fold Change)	p-value	GO term	CKR1	CKR2	CKR 3	NNR1	NNR2	NNR3	p-adj	KEGG annotation
GO:0005576 extracellular region
TEA000961.1	-2.21202	1.26219e-05	Extracellular region	3.85	4.02	2.66	0.07	0.08	0.59	1.09424e-05	Expansin-B5
TEA001789.1	-1.61412	0.000266108	Extracellular region	9.74	15.94	4.22	2.44	2.75	1.96	1.09424e-05	Hypothetical protein
TEA002668.1	-1.11284	0.000165241	Extracellular region	24.54	43.05	27.32	13.06	13.57	14.69	1.09424e-05	Germin-like protein subfamily 1 member 17
TEA002999.1	-1.7903	8.98932e-10	Extracellular region	23.51	21.55	28.4	7.95	6.6	4.26	1.09424e-05	Germin-like protein subfamily 1 member 17
TEA003281.1	-1.60397	7.26104e-05	Extracellular region	58.3	42.73	17.24	9.47	11.26	9.78	1.09424e-05	Germin-like protein subfamily 1 member 17
TEA003333.1	-1.8013	1.96312e-07	Extracellular region	46.37	84.25	31.2	12.92	12.88	12.5	1.09424e-05	Expansin-A1-like
TEA003524.1	1.79192	0.00084	Extracellular region	0.05	0.44	1.08	4.86	4.36	5.18	1.09424e-05	Germin-like protein subfamily 1 member 17
TEA004008.1	-1.16305	0.0190807	Extracellular region	43.28	47.87	144.38	28.48	29.95	27	1.09424e-05	Germin-like protein subfamily 1 member 17
TEA004065.1	-1.1064	0.00548305	Extracellular region	22.28	12.11	31.31	9.84	8.62	8.87	1.09424e-05	Peroxidase 72-like
TEA004541.1	-1.88639	3.34911e-12	Extracellular region	152.65	237.99	123.69	43.96	37.28	42.9	1.09424e-05	Basic form of pathogenesis-related protein 1
TEA004542.1	-1.68404	1.00196e-06	Extracellular region	71.11	108.47	41.56	18.29	20.78	18.82	1.09424e-05	Pathogenesis-related leaf protein 6
TEA006060.1	1.18865	0.0375389	Extracellular region	15.6	9.62	1.85	32.25	31.86	26.14	1.09424e-05	Germin-like protein subfamily 1 member 17
TEA010004.1	-1.09004	0.0130052	Extracellular region	28.04	43.27	13.56	11.98	12.48	9.86	1.09424e-05	Hypothetical protein
TEA010589.1	-1.34235	0.00875187	Extracellular region	76.85	97.78	338.01	46.91	52.7	47.84	1.09424e-05	Germin-like protein subfamily 1 member 17
TEA011905.1	1.09631	0.029023	Extracellular region	16.19	10.34	3.45	26.94	26.33	26	1.09424e-05	Hypothetical protein
TEA012425.1	1.44128	3.69778e-07	Extracellular region	5.43	4.55	2.66	12.06	12.18	13.6	1.09424e-05	Polygalacturonase At1g48100-like
TEA012700.1	-1.49288	0.000568404	Extracellular region	5.31	5.82	12.82	2.51	2.34	1.86	1.09424e-05	Germin-like protein subfamily 1 member 17
TEA015711.1	1.41397	0.000425825	Extracellular region	2.97	2.29	1.11	6	6.72	7.97	1.09424e-05	-
TEA015728.1	1.47921	0.0111207	Extracellular region	0.37	0.15	2.54	8.62	9	6.52	1.09424e-05	-
TEA015753.1	-1.29737	0.000342532	Extracellular region	51.7	35.85	86.52	22.16	20.89	20	1.09424e-05	Germin-like protein subfamily 1 member 17
TEA016870.1	-1.04419	0.047281	Extracellular region	38.29	46.91	138.89	32.25	29.54	27.69	1.09424e-05	Germin-like protein subfamily 1 member 17
TEA016871.1	-1.46892	0.00480069	Extracellular region	11.22	15.58	57.84	7.13	6.59	6.49	1.09424e-05	Germin-like protein subfamily 1 member 17
TEA018757.1	-1.27884	0.00528046	Extracellular region	38	29.19	93.52	18.61	19.29	16.14	1.09424e-05	Germin-like protein subfamily 1 member 17
TEA021361.1	-1.77294	4.08729e-05	Extracellular region	19.14	35.7	9.98	4.91	4.77	3.81	1.09424e-05	Pathogenesis-related leaf protein 6
TEA022147.1	-4.37735	2.03989e-41	Extracellular region	13.23	9.36	7.75	0.4	0.2	0.23	1.09424e-05	Hypothetical protein
TEA022953.1	-1.35053	2.4185e-08	Extracellular region	74.06	59.95	96.46	26.86	29.73	29.53	1.09424e-05	Peroxidase 42-like
TEA026394.1	-1.7627	1.36469e-26	Extracellular region	51.31	58.48	60.72	16.95	17.02	14.88	1.09424e-05	Germin-like protein subfamily 1 member 17
TEA026507.1	-2.28912	1.09985e-06	Extracellular region	24.68	34.75	6	2.59	2.45	1.35	1.09424e-05	Zeamatin
TEA027597.1	-1.17806	0.0065067	Extracellular region	4.09	5.75	2.9	1.74	1.82	1.2	1.09424e-05	Germin-like protein subfamily 1 member 17
TEA028568.1	1.35506	6.53788e-05	Extracellular region	17.61	8.45	18.67	42.42	47.03	41.99	1.09424e-05	Pectinesterase 2
TEA029053.1	-1.39211	7.85603e-07	Extracellular region	32.07	25.44	42.42	10.08	12.03	13.27	1.09424e-05	Germin-like protein subfamily 1 member 17
TEA031911.1	-2.10835	1.04336e-12	Extracellular region	82.08	55.41	37.69	10.05	11.77	12.56	1.09424e-05	Germin-like protein subfamily 1 member 17
TEA032349.1	-1.62771	0.00212396	Extracellular region	8.64	11.87	1.71	1.19	1.25	1.4	1.09424e-05	Zeamatin
TEA033183.1	1.03199	0.00265951	Extracellular region	9.06	8.39	4.14	15.99	15.01	17.19	1.09424e-05	Polygalacturonase family protein
GO:0004497 monooxygenase activity
TEA000615.1	-1.48013	0.000262999	Monooxygenase activity	21.99	16.69	45.79	8.91	6.89	9.14	3.42208e-05	Isoflavone 2'-hydroxylase-like
TEA001041.1	1.51357	0.00564867	Monooxygenase activity	1.45	0.92	0.13	4.39	4.38	4.17	3.42208e-05	POPTRDRAFT_644172
TEA001688.1	-1.36149	0.00724205	Monooxygenase activity	5.54	6.71	1.45	1.14	1.18	1.46	3.42208e-05	Cytokinin hydroxylase
TEA008189.1	-1.76943	1.45612e-06	Monooxygenase activity	8.07	6.78	13.55	2.11	1.86	2.82	3.42208e-05	Cytochrome P450, family 81, subfamily D, polypeptide 8
TEA008194.1	-1.70529	0.000185129	Monooxygenase activity	11.99	14.5	41.16	4.95	4.53	5.09	3.42208e-05	Cytochrome P450, family 81, subfamily D, polypeptide 8
TEA008466.1	-2.11138	8.92388e-08	Monooxygenase activity	21.97	23.98	9.16	2.15	4.21	2.63	3.42208e-05	Beta-amyrin 28-oxidase-like
TEA008526.1	-1.16386	0.0055395	Monooxygenase activity	1.58	3.02	1.37	0.88	0.71	0.71	3.42208e-05	Cytochrome P450 82C4-like
TEA009564.1	1.82039	2.12802e-09	Monooxygenase activity	4.21	6.57	8.57	27.75	24.07	28.97	3.42208e-05	Hypothetical protein
TEA009580.1	3.08215	1.16536e-27	Monooxygenase activity	1.79	3.37	3.57	32.76	33.75	29.78	3.42208e-05	Hypothetical protein
TEA010860.1	-1.16889	0.0205527	Monooxygenase activity	17.82	23.57	5.1	4.94	5.6	5.62	3.42208e-05	Cytochrome P450 71D10, putative
TEA010962.1	2.20033	2.71013e-14	Monooxygenase activity	14.24	7.15	7.56	52.72	57.65	48.41	3.42208e-05	Cytochrome P450 93A3
TEA011129.1	-1.08574	0.00604928	Monooxygenase activity	3.35	3.72	3.82	1.97	0.87	1.76	3.42208e-05	Cytochrome P450 71A1-like
TEA012006.1	-1.92634	2.61745e-08	Monooxygenase activity	45.45	42.07	17.37	7.24	7.43	7.55	3.42208e-05	Beta-amyrin 28-oxidase-like
TEA012175.1	-1.23864	0.028435	Monooxygenase activity	0.44	2.72	0.15	0.04	0	0	3.42208e-05	Cytochrome P450
TEA014508.1	-1.3276	0.0277389	Monooxygenase activity	0.35	7.61	1.15	0.34	0.39	0.34	3.42208e-05	Cytochrome P450
TEA016153.1	-1.11071	4.23925e-21	Monooxygenase activity	179.83	171.57	180.84	87.11	81.36	77.71	3.42208e-05	Hypothetical protein
TEA016604.1	1.40257	0.00552452	Monooxygenase activity	9.82	9.13	1.76	27.45	27.07	23.85	3.42208e-05	3-hydroxybenzoate 6-hydroxylase-like
TEA018547.1	2.1122	5.20192e-24	Monooxygenase activity	2.07	3.01	2.62	12.76	12.56	11.21	3.42208e-05	Cytochrome P450
TEA020791.1	-1.59298	1.87647e-14	Monooxygenase activity	14.74	15.22	19.47	5.15	4.91	5.64	3.42208e-05	Geraniol 8-hydroxylase-like
TEA023047.1	1.13919	0.00584123	Monooxygenase activity	36.26	21.5	11.21	58.71	60.12	56.82	3.42208e-05	Cytochrome P450 93A3
TEA024389.1	-2.06656	2.31841e-06	Monooxygenase activity	2.37	3.16	1.23	0.23	0.31	0.48	3.42208e-05	Hypothetical protein
TEA026499.1	-1.24593	0.0441621	Monooxygenase activity	0.22	0.27	0.39	0	0.04	0.08	3.42208e-05	Hypothetical protein
TEA026878.1	1.48348	1.08246e-05	Monooxygenase activity	1	1.04	0.52	2.57	2.84	2.85	3.42208e-05	Taxadiene 5-alpha hydroxylase
TEA027891.1	1.13037	0.000384341	Monooxygenase activity	29.79	19.91	13.34	54.02	51.15	45.41	3.42208e-05	Ent-kaurenoic acid oxidase 1-like
TEA028270.1	1.02602	0.0380426	Monooxygenase activity	0.53	0.54	1.22	1.71	1.92	2.07	3.42208e-05	Cytochrome P450 714A1-like
TEA028665.1	2.74381	3.32653e-08	Monooxygenase activity	0	0	0	2.37	3.55	1.97	3.42208e-05	Cytochrome P450 98A2
TEA031406.1	1.57861	3.00241e-05	Monooxygenase activity	21.5	15.27	6.77	52.61	54.46	52.02	3.42208e-05	Cytochrome P450, family 722, subfamily A, polypeptide 1
TEA033696.1	1.25748	0.0176344	Monooxygenase activity	10.88	10.83	1.97	27.77	24.33	26.72	3.42208e-05	Zeaxanthin epoxidase, chloroplastic-like
GO:0045735 nutrient reservoir activity
TEA002668.1	-1.11284	0.000165241	Nutrient reservoir activity	24.54	43.05	27.32	13.06	13.57	14.69	3.95978e-05	Germin-like protein subfamily 1 member 17
TEA002999.1	-1.7903	8.98932e-10	Nutrient reservoir activity	23.51	21.55	28.4	7.95	6.6	4.26	3.95978e-05	Germin-like protein subfamily 1 member 17
TEA003281.1	-1.60397	7.26104e-05	Nutrient reservoir activity	58.3	42.73	17.24	9.47	11.26	9.78	3.95978e-05	Germin-like protein subfamily 1 member 17
TEA003524.1	1.79192	0.00084	Nutrient reservoir activity	0.05	0.44	1.08	4.86	4.36	5.18	3.95978e-05	Germin-like protein subfamily 1 member 17
TEA004008.1	-1.16305	0.0190807	Nutrient reservoir activity	43.28	47.87	144.38	28.48	29.95	27	3.95978e-05	Germin-like protein subfamily 1 member 17
TEA006060.1	1.18865	0.0375389	Nutrient reservoir activity	15.6	9.62	1.85	32.25	31.86	26.14	3.95978e-05	Germin-like protein subfamily 1 member 17
TEA010589.1	-1.34235	0.00875187	Nutrient reservoir activity	76.85	97.78	338.01	46.91	52.7	47.84	3.95978e-05	Germin-like protein subfamily 1 member 17
TEA012700.1	-1.49288	0.000568404	Nutrient reservoir activity	5.31	5.82	12.82	2.51	2.34	1.86	3.95978e-05	Germin-like protein subfamily 1 member 17
TEA015753.1	-1.29737	0.000342532	Nutrient reservoir activity	51.7	35.85	86.52	22.16	20.89	20	3.95978e-05	Germin-like protein subfamily 1 member 17
TEA016870.1	-1.04419	0.047281	Nutrient reservoir activity	38.29	46.91	138.89	32.25	29.54	27.69	3.95978e-05	Germin-like protein subfamily 1 member 17
TEA016871.1	-1.46892	0.00480069	Nutrient reservoir activity	11.22	15.58	57.84	7.13	6.59	6.49	3.95978e-05	Germin-like protein subfamily 1 member 17
TEA018757.1	-1.27884	0.00528046	Nutrient reservoir activity	38	29.19	93.52	18.61	19.29	16.14	3.95978e-05	Germin-like protein subfamily 1 member 17
TEA026394.1	-1.7627	1.36469e-26	Nutrient reservoir activity	51.31	58.48	60.72	16.95	17.02	14.88	3.95978e-05	Germin-like protein subfamily 1 member 17
TEA027597.1	-1.17806	0.0065067	Nutrient reservoir activity	4.09	5.75	2.9	1.74	1.82	1.2	3.95978e-05	Germin-like protein subfamily 1 member 17
TEA029053.1	-1.39211	7.85603e-07	Nutrient reservoir activity	32.07	25.44	42.42	10.08	12.03	13.27	3.95978e-05	Germin-like protein subfamily 1 member 17
TEA031911.1	-2.10835	1.04336e-12	Nutrient reservoir activity	82.08	55.41	37.69	10.05	11.77	12.56	3.95978e-05	Germin-like protein subfamily 1 member 17
GO:0016705 oxidoreductase activity
TEA000615.1	-1.48013	0.000262999	Oxidoreductase activity, acting on paired donors, with incorporation or reduction of molecular oxygen	21.99	16.69	45.79	8.91	6.89	9.14	8.40041e-05	Isoflavone 2'-hydroxylase-like
TEA001041.1	1.51357	0.00564867	Oxidoreductase activity, acting on paired donors, with incorporation or reduction of molecular oxygen	1.45	0.92	0.13	4.39	4.38	4.17	8.40041e-05	POPTRDRAFT_644172
TEA001688.1	-1.36149	0.00724205	Oxidoreductase activity, acting on paired donors, with incorporation or reduction of molecular oxygen	5.54	6.71	1.45	1.14	1.18	1.46	8.40041e-05	Cytokinin hydroxylase
TEA008189.1	-1.76943	1.45612e-06	Oxidoreductase activity, acting on paired donors, with incorporation or reduction of molecular oxygen	8.07	6.78	13.55	2.11	1.86	2.82	8.40041e-05	Cytochrome P450, family 81, subfamily D, polypeptide 8
TEA008194.1	-1.70529	0.000185129	Oxidoreductase activity, acting on paired donors, with incorporation or reduction of molecular oxygen	11.99	14.5	41.16	4.95	4.53	5.09	8.40041e-05	Cytochrome P450, family 81, subfamily D, polypeptide 8
TEA008466.1	-2.11138	8.92388e-08	Oxidoreductase activity, acting on paired donors, with incorporation or reduction of molecular oxygen	21.97	23.98	9.16	2.15	4.21	2.63	8.40041e-05	Beta-amyrin 28-oxidase-like
TEA008526.1	-1.16386	0.0055395	Oxidoreductase activity, acting on paired donors, with incorporation or reduction of molecular oxygen	1.58	3.02	1.37	0.88	0.71	0.71	8.40041e-05	Cytochrome P450 82C4-like
TEA009564.1	1.82039	2.12802e-09	Oxidoreductase activity, acting on paired donors, with incorporation or reduction of molecular oxygen	4.21	6.57	8.57	27.75	24.07	28.97	8.40041e-05	Hypothetical protein
TEA009580.1	3.08215	1.16536e-27	Oxidoreductase activity, acting on paired donors, with incorporation or reduction of molecular oxygen	1.79	3.37	3.57	32.76	33.75	29.78	8.40041e-05	Hypothetical protein
TEA010860.1	-1.16889	0.0205527	Oxidoreductase activity, acting on paired donors, with incorporation or reduction of molecular oxygen	17.82	23.57	5.1	4.94	5.6	5.62	8.40041e-05	Cytochrome P450 71D10, putative
TEA010962.1	2.20033	2.71013e-14	Oxidoreductase activity, acting on paired donors, with incorporation or reduction of molecular oxygen	14.24	7.15	7.56	52.72	57.65	48.41	8.40041e-05	Cytochrome P450 93A3
TEA011129.1	-1.08574	0.00604928	Oxidoreductase activity, acting on paired donors, with incorporation or reduction of molecular oxygen	3.35	3.72	3.82	1.97	0.87	1.76	8.40041e-05	Cytochrome P450 71A1-like
TEA012006.1	-1.92634	2.61745e-08	Oxidoreductase activity, acting on paired donors, with incorporation or reduction of molecular oxygen	45.45	42.07	17.37	7.24	7.43	7.55	8.40041e-05	Beta-amyrin 28-oxidase-like
TEA014508.1	-1.3276	0.0277389	Oxidoreductase activity, acting on paired donors, with incorporation or reduction of molecular oxygen	0.35	7.61	1.15	0.34	0.39	0.34	8.40041e-05	Cytochrome P450
TEA018547.1	2.1122	5.20192e-24	Oxidoreductase activity, acting on paired donors, with incorporation or reduction of molecular oxygen	2.07	3.01	2.62	12.76	12.56	11.21	8.40041e-05	Cytochrome P450
TEA020791.1	-1.59298	1.87647e-14	Oxidoreductase activity, acting on paired donors, with incorporation or reduction of molecular oxygen	14.74	15.22	19.47	5.15	4.91	5.64	8.40041e-05	Geraniol 8-hydroxylase-like
TEA021696.1	-1.03166	0.00242454	Oxidoreductase activity, acting on paired donors, with incorporation or reduction of molecular oxygen	48.91	46.84	88.18	28.51	29.94	25.92	8.40041e-05	RpoA, RCOM_ORF00076
TEA023047.1	1.13919	0.00584123	Oxidoreductase activity, acting on paired donors, with incorporation or reduction of molecular oxygen	36.26	21.5	11.21	58.71	60.12	56.82	8.40041e-05	Cytochrome P450 93A3
TEA026499.1	-1.24593	0.0441621	Oxidoreductase activity, acting on paired donors, with incorporation or reduction of molecular oxygen	0.22	0.27	0.39	0	0.04	0.08	8.40041e-05	Hypothetical protein
TEA026878.1	1.48348	1.08246e-05	Oxidoreductase activity, acting on paired donors, with incorporation or reduction of molecular oxygen	1	1.04	0.52	2.57	2.84	2.85	8.40041e-05	Taxadiene 5-alpha hydroxylase
TEA027891.1	1.13037	0.000384341	Oxidoreductase activity, acting on paired donors, with incorporation or reduction of molecular oxygen	29.79	19.91	13.34	54.02	51.15	45.41	8.40041e-05	Ent-kaurenoic acid oxidase 1-like
TEA028270.1	1.02602	0.0380426	Oxidoreductase activity, acting on paired donors, with incorporation or reduction of molecular oxygen	0.53	0.54	1.22	1.71	1.92	2.07	8.40041e-05	Cytochrome P450 714A1-like
TEA028658.1	2.44838	1.60186e-06	Oxidoreductase activity, acting on paired donors, with incorporation or reduction of molecular oxygen	0	0	0	1.22	2.3	1.46	8.40041e-05	Cytochrome P450 98A2
TEA028665.1	2.74381	3.32653e-08	Oxidoreductase activity, acting on paired donors, with incorporation or reduction of molecular oxygen	0	0	0	2.37	3.55	1.97	8.40041e-05	Cytochrome P450 98A2
TEA031406.1	1.57861	3.00241e-05	Oxidoreductase activity, acting on paired donors, with incorporation or reduction of molecular oxygen	21.5	15.27	6.77	52.61	54.46	52.02	8.40041e-05	Cytochrome P450, family 722, subfamily A, polypeptide 1
GO:0008152 metabolic process (Biolgical process)
TEA001331.1	-1.66569	9.59221e-06	Metabolic process	50.6	43.51	109.88	18.8	16.79	17.36	0.000191044	POPTRDRAFT_774070
TEA001455.1	-1.49332	0.00702855	Metabolic process	0.43	0.39	1.14	0.1	0.14	0.13	0.000191044	Ethylene-responsive transcription factor RAP2-7-like
TEA002074.1	-3.65549	3.08124e-15	Metabolic process	0.96	0.78	1.63	0	0	0	0.000191044	Mitogen-activated protein kinase kinase kinase NPK1
TEA002414.1	-1.75651	9.20167e-07	Metabolic process	9.38	10.09	19.39	3.76	2.96	2.82	0.000191044	SORBIDRAFT_01g001220, Sb01g001220
TEA002417.1	-1.87044	1.07773e-08	Metabolic process	8.49	12.81	14.45	3.22	3.08	1.96	0.000191044	Cyanohydrin beta-glucosyltransferase-like
TEA002418.1	-2.32901	5.65647e-09	Metabolic process	5.11	7.58	3.1	0.87	0.6	0.58	0.000191044	SORBIDRAFT_01g001220, Sb01g001220
TEA003717.1	1.56767	2.86927e-09	Metabolic process	1.63	2.12	1.33	5.73	4.7	6.18	0.000191044	Aconitate hydratase, cytoplasmic
TEA005507.1	-1.19748	0.0116784	Metabolic process	1.75	2.01	2.87	0.82	0.7	0.84	0.000191044	SORBIDRAFT_01g001220, Sb01g001220
TEA006994.1	-4.69492	7.04485e-33	Metabolic process	21.21	12.98	32.73	0.14	0.22	0.45	0.000191044	Tuliposide A-converting enzyme 2, chloroplastic-like
TEA008410.1	-1.46207	3.87866e-12	Metabolic process	9.95	11.46	8.79	3.91	3.43	3.15	0.000191044	Salicylic acid-binding protein 2
TEA008451.1	-2.25853	5.43291e-25	Metabolic process	10.19	8.81	9.65	1.58	2.23	1.69	0.000191044	Scopoletin glucosyltransferase
TEA009309.1	1.68144	1.15924e-08	Metabolic process	3.03	1.83	1.98	7.73	9.51	7.88	0.000191044	SORBIDRAFT_01g001220, Sb01g001220
TEA010880.1	-1.97781	2.33135e-06	Metabolic process	4.22	1.74	2.43	0.32	0.58	0.56	0.000191044	Zeatin O-glucosyltransferase-like
TEA012280.1	-1.56054	1.46211e-06	Metabolic process	8.02	7.79	7.16	1.69	2.81	2.34	0.000191044	N-acylneuraminate-9-phosphatase
TEA012394.1	-1.70185	0.00136819	Metabolic process	0.49	0.41	1.06	0.08	0.1	0.11	0.000191044	Cytokinin-O-glucosyltransferase 2
TEA012722.1	-1.28435	0.0148861	Metabolic process	2.24	2.86	7.6	1.6	0.9	1.29	0.000191044	UDP-glycosyltransferase 73C1-like
TEA013203.1	1.27646	0.0379138	Metabolic process	0.19	0.59	0.02	2.14	1.41	1.26	0.000191044	Polygalacturonase At1g48100-like
TEA014953.1	1.41246	0.00680755	Metabolic process	0.42	0.47	0.09	1.47	1.29	1.23	0.000191044	UDP-glucosyl transferase 72C1
TEA016859.1	1.45481	0.00564867	Metabolic process	0.12	0.25	0.14	0.79	0.62	0.8	0.000191044	Cyanohydrin beta-glucosyltransferase-like
TEA017045.1	1.67274	0.000508491	Metabolic process	2.51	1.6	7.38	18.1	20.1	20.13	0.000191044	Catalytic LigB subunit of aromatic ring-opening dioxygenase family isoform 1
TEA019042.1	1.23449	0.0121104	Metabolic process	0.14	0.14	0.08	0.36	0.36	0.37	0.000191044	Hypothetical protein
TEA019223.1	-1.00008	8.60293e-07	Metabolic process	26.14	25.57	18.32	10.6	11.54	12.07	0.000191044	Enoyl-CoA hydratase
TEA020312.1	1.40787	0.0169215	Metabolic process	0	0.03	0.31	1.27	1.44	1.26	0.000191044	Putative receptor-like protein kinase At3g47110
TEA020379.1	-1.2704	0.000272056	Metabolic process	8.19	13.44	5.86	3.4	3.28	3.48	0.000191044	GID1b-1
TEA023525.1	-5.5106	6.85435e-41	Metabolic process	20.67	22.28	40.11	0	0	0	0.000191044	-
TEA023576.1	4.27037	5.94421e-23	Metabolic process	0	0	0	3.34	2.65	3.48	0.000191044	Pyruvate dehydrogenase E1 component subunit beta-1, mitochondrial
TEA025181.1	2.00628	3.73792e-15	Metabolic process	9.85	7.04	12.82	47.16	44.01	44.91	0.000191044	Alpha-N-acetylglucosaminidase
TEA026803.1	1.23342	0.000220272	Metabolic process	5.25	3.07	2.72	8.72	11.13	9.14	0.000191044	-
TEA026939.1	1.28196	0.0188477	Metabolic process	5.28	2.06	0.77	8.42	10.52	9.96	0.000191044	SORBIDRAFT_01g001220, Sb01g001220
TEA027911.1	-1.22865	0.0103876	Metabolic process	7.96	9.87	25.51	5.49	4.89	4.58	0.000191044	Hypothetical protein
TEA027973.1	1.54137	0.000410078	Metabolic process	1.66	1.04	3.5	7.75	8.79	7.85	0.000191044	Tuliposide A-converting enzyme 2, chloroplastic-like
TEA028632.1	1.95159	0.000228738	Metabolic process	0.45	0	0.97	5.64	5.59	6.47	0.000191044	Hypothetical protein
TEA029559.1	1.02768	3.37782e-12	Metabolic process	14.25	11.24	12.25	26.09	26.47	26.52	0.000191044	Tuliposide A-converting enzyme 2, chloroplastic-like
TEA032085.1	1.0606	0.00238906	Metabolic process	16.28	10.97	6.77	25.49	25.6	26.82	0.000191044	Serine/threonine-protein kinase STY46
TEA032704.1	-1.22115	1.34802e-09	Metabolic process	18.31	22.07	20.05	8.69	8.63	7.9	0.000191044	-
TEA032785.1	2.13214	3.97913e-07	Metabolic process	0.18	0.19	0.1	0.88	1.11	1.26	0.000191044	Probable LRR receptor-like serine/threonine-protein kinase At3g47570
TEA033138.1	1.77289	1.19845e-08	Metabolic process	0.92	0.67	0.43	2.51	2.82	2.77	0.000191044	Hypothetical protein
TEA033457.1	1.43592	0.00831787	Metabolic process	0.27	0.29	0.05	0.87	1.05	0.86	0.000191044	Aldehyde dehydrogenase family 2 member C4-like
TEA034016.1	1.02717	0.00351754	Metabolic process	9.23	7.12	3.98	15.34	15.63	14.37	0.000191044	Flavanone 3-dioxygenase-like
GO:0030145 manganese ion binding
TEA002668.1	-1.11284	0.000165241	Manganese ion binding	24.54	43.05	27.32	13.06	13.57	14.69	0.000222494	Germin-like protein subfamily 1 member 17
TEA002999.1	-1.7903	8.98932e-10	Manganese ion binding	23.51	21.55	28.4	7.95	6.6	4.26	0.000222494	Germin-like protein subfamily 1 member 17
TEA003281.1	-1.60397	7.26104e-05	Manganese ion binding	58.3	42.73	17.24	9.47	11.26	9.78	0.000222494	Germin-like protein subfamily 1 member 17
TEA003524.1	1.79192	0.00084	Manganese ion binding	0.05	0.44	1.08	4.86	4.36	5.18	0.000222494	Germin-like protein subfamily 1 member 17
TEA004008.1	-1.16305	0.0190807	Manganese ion binding	43.28	47.87	144.38	28.48	29.95	27	0.000222494	Germin-like protein subfamily 1 member 17
TEA006060.1	1.18865	0.0375389	Manganese ion binding	15.6	9.62	1.85	32.25	31.86	26.14	0.000222494	Germin-like protein subfamily 1 member 17
TEA010589.1	-1.34235	0.00875187	Manganese ion binding	76.85	97.78	338.01	46.91	52.7	47.84	0.000222494	Germin-like protein subfamily 1 member 17
TEA012700.1	-1.49288	0.000568404	Manganese ion binding	5.31	5.82	12.82	2.51	2.34	1.86	0.000222494	Germin-like protein subfamily 1 member 17
TEA015753.1	-1.29737	0.000342532	Manganese ion binding	51.7	35.85	86.52	22.16	20.89	20	0.000222494	Germin-like protein subfamily 1 member 17
TEA016870.1	-1.04419	0.047281	Manganese ion binding	38.29	46.91	138.89	32.25	29.54	27.69	0.000222494	Germin-like protein subfamily 1 member 17
TEA016871.1	-1.46892	0.00480069	Manganese ion binding	11.22	15.58	57.84	7.13	6.59	6.49	0.000222494	Germin-like protein subfamily 1 member 17
TEA018757.1	-1.27884	0.00528046	Manganese ion binding	38	29.19	93.52	18.61	19.29	16.14	0.000222494	Germin-like protein subfamily 1 member 17
TEA026394.1	-1.7627	1.36469e-26	Manganese ion binding	51.31	58.48	60.72	16.95	17.02	14.88	0.000222494	Germin-like protein subfamily 1 member 17
TEA027597.1	-1.17806	0.0065067	Manganese ion binding	4.09	5.75	2.9	1.74	1.82	1.2	0.000222494	Germin-like protein subfamily 1 member 17
TEA029053.1	-1.39211	7.85603e-07	Manganese ion binding	32.07	25.44	42.42	10.08	12.03	13.27	0.000222494	Germin-like protein subfamily 1 member 17
TEA031911.1	-2.10835	1.04336e-12	Manganese ion binding	82.08	55.41	37.69	10.05	11.77	12.56	0.000222494	Germin-like protein subfamily 1 member 17
GO:0020037 heme binding
TEA001041.1	1.51357	0.00564867	Heme binding	1.45	0.92	0.13	4.39	4.38	4.17	0.000755048	POPTRDRAFT_644172
TEA001688.1	-1.36149	0.00724205	Heme binding	5.54	6.71	1.45	1.14	1.18	1.46	0.000755048	Cytokinin hydroxylase
TEA001789.1	-1.61412	0.000266108	Heme binding	9.74	15.94	4.22	2.44	2.75	1.96	0.000755048	Hypothetical protein
TEA004065.1	-1.1064	0.00548305	Heme binding	22.28	12.11	31.31	9.84	8.62	8.87	0.000755048	Peroxidase 72-like
TEA008189.1	-1.76943	1.45612e-06	Heme binding	8.07	6.78	13.55	2.11	1.86	2.82	0.000755048	Cytochrome P450, family 81, subfamily D, polypeptide 8
TEA008194.1	-1.70529	0.000185129	Heme binding	11.99	14.5	41.16	4.95	4.53	5.09	0.000755048	Cytochrome P450, family 81, subfamily D, polypeptide 8
TEA008466.1	-2.11138	8.92388e-08	Heme binding	21.97	23.98	9.16	2.15	4.21	2.63	0.000755048	Beta-amyrin 28-oxidase-like
TEA008526.1	-1.16386	0.0055395	Heme binding	1.58	3.02	1.37	0.88	0.71	0.71	0.000755048	Cytochrome P450 82C4-like
TEA009564.1	1.82039	2.12802e-09	Heme binding	4.21	6.57	8.57	27.75	24.07	28.97	0.000755048	Hypothetical protein
TEA009580.1	3.08215	1.16536e-27	Heme binding	1.79	3.37	3.57	32.76	33.75	29.78	0.000755048	Hypothetical protein
TEA010860.1	-1.16889	0.0205527	Heme binding	17.82	23.57	5.1	4.94	5.6	5.62	0.000755048	Cytochrome P450 71D10, putative
TEA010962.1	2.20033	2.71013e-14	Heme binding	14.24	7.15	7.56	52.72	57.65	48.41	0.000755048	Cytochrome P450 93A3
TEA011129.1	-1.08574	0.00604928	Heme binding	3.35	3.72	3.82	1.97	0.87	1.76	0.000755048	Cytochrome P450 71A1-like
TEA012006.1	-1.92634	2.61745e-08	Heme binding	45.45	42.07	17.37	7.24	7.43	7.55	0.000755048	Beta-amyrin 28-oxidase-like
TEA013227.1	-2.23806	8.31217e-08	Heme binding	45.27	50.23	152.16	11.59	11.38	11.29	0.000755048	Ferredoxin--nitrite reductase, chloroplastic
TEA014079.1	-2.46099	1.01042e-06	Heme binding	3.07	5.05	1.38	0.07	0.02	0.28	0.000755048	Geraniol 8-hydroxylase-like
TEA014508.1	-1.3276	0.0277389	Heme binding	0.35	7.61	1.15	0.34	0.39	0.34	0.000755048	Cytochrome P450
TEA018285.1	-1.088	0.00108834	Heme binding	8.04	8.58	13.12	3.98	5.15	3.92	0.000755048	Hypothetical protein
TEA018547.1	2.1122	5.20192e-24	Heme binding	2.07	3.01	2.62	12.76	12.56	11.21	0.000755048	Cytochrome P450
TEA020633.1	1.12341	1.78495e-09	Heme binding	3.31	2.76	2.37	6.5	6.66	5.93	0.000755048	Hypothetical protein
TEA020791.1	-1.59298	1.87647e-14	Heme binding	14.74	15.22	19.47	5.15	4.91	5.64	0.000755048	Geraniol 8-hydroxylase-like
TEA022953.1	-1.35053	2.4185e-08	Heme binding	74.06	59.95	96.46	26.86	29.73	29.53	0.000755048	Peroxidase 42-like
TEA023047.1	1.13919	0.00584123	Heme binding	36.26	21.5	11.21	58.71	60.12	56.82	0.000755048	Cytochrome P450 93A3
TEA025494.1	-2.5607	1.49199e-26	Heme binding	153.25	208.57	261.05	31.94	29.7	32.08	0.000755048	-
TEA025560.1	1.11245	0.00271355	Heme binding	38.7	33.94	14.8	72.06	71.49	68.1	0.000755048	Lj3g3v1475790.2
TEA026499.1	-1.24593	0.0441621	Heme binding	0.22	0.27	0.39	0	0.04	0.08	0.000755048	Hypothetical protein
TEA026878.1	1.48348	1.08246e-05	Heme binding	1	1.04	0.52	2.57	2.84	2.85	0.000755048	Taxadiene 5-alpha hydroxylase
TEA027891.1	1.13037	0.000384341	Heme binding	29.79	19.91	13.34	54.02	51.15	45.41	0.000755048	Ent-kaurenoic acid oxidase 1-like
TEA028270.1	1.02602	0.0380426	Heme binding	0.53	0.54	1.22	1.71	1.92	2.07	0.000755048	Cytochrome P450 714A1-like
TEA028658.1	2.44838	1.60186e-06	Heme binding	0	0	0	1.22	2.3	1.46	0.000755048	Cytochrome P450 98A2
TEA028665.1	2.74381	3.32653e-08	Heme binding	0	0	0	2.37	3.55	1.97	0.000755048	Cytochrome P450 98A2
TEA031406.1	1.57861	3.00241e-05	Heme binding	21.5	15.27	6.77	52.61	54.46	52.02	0.000755048	Cytochrome P450, family 722, subfamily A, polypeptide 1
GO:0005506 iron ion binding
TEA001041.1	1.51357	0.00564867	Iron ion binding	1.45	0.92	0.13	4.39	4.38	4.17	0.00219411	POPTRDRAFT_644172
TEA001688.1	-1.36149	0.00724205	Iron ion binding	5.54	6.71	1.45	1.14	1.18	1.46	0.00219411	Cytokinin hydroxylase
TEA002405.1	-1.47808	7.08117e-12	Iron ion binding	19.67	23.4	15.36	6.38	7	6.61	0.00219411	Flavonol synthase/flavanone 3-hydroxylase
TEA008189.1	-1.76943	1.45612e-06	Iron ion binding	8.07	6.78	13.55	2.11	1.86	2.82	0.00219411	Cytochrome P450, family 81, subfamily D, polypeptide 8
TEA008194.1	-1.70529	0.000185129	Iron ion binding	11.99	14.5	41.16	4.95	4.53	5.09	0.00219411	Cytochrome P450, family 81, subfamily D, polypeptide 8
TEA008466.1	-2.11138	8.92388e-08	Iron ion binding	21.97	23.98	9.16	2.15	4.21	2.63	0.00219411	Beta-amyrin 28-oxidase-like
TEA008526.1	-1.16386	0.0055395	Iron ion binding	1.58	3.02	1.37	0.88	0.71	0.71	0.00219411	Cytochrome P450 82C4-like
TEA009564.1	1.82039	2.12802e-09	Iron ion binding	4.21	6.57	8.57	27.75	24.07	28.97	0.00219411	Hypothetical protein
TEA009580.1	3.08215	1.16536e-27	Iron ion binding	1.79	3.37	3.57	32.76	33.75	29.78	0.00219411	Hypothetical protein
TEA010860.1	-1.16889	0.0205527	Iron ion binding	17.82	23.57	5.1	4.94	5.6	5.62	0.00219411	Cytochrome P450 71D10, putative
TEA010962.1	2.20033	2.71013e-14	Iron ion binding	14.24	7.15	7.56	52.72	57.65	48.41	0.00219411	Cytochrome P450 93A3
TEA011129.1	-1.08574	0.00604928	Iron ion binding	3.35	3.72	3.82	1.97	0.87	1.76	0.00219411	Cytochrome P450 71A1-like
TEA012006.1	-1.92634	2.61745e-08	Iron ion binding	45.45	42.07	17.37	7.24	7.43	7.55	0.00219411	Beta-amyrin 28-oxidase-like
TEA013443.1	-1.06093	0.00135767	Iron ion binding	22.63	29.98	13.94	10.66	9.75	9.13	0.00219411	Leucoanthocyanidin dioxygenase
TEA014079.1	-2.46099	1.01042e-06	Iron ion binding	3.07	5.05	1.38	0.07	0.02	0.28	0.00219411	Geraniol 8-hydroxylase-like
TEA014508.1	-1.3276	0.0277389	Iron ion binding	0.35	7.61	1.15	0.34	0.39	0.34	0.00219411	Cytochrome P450
TEA018547.1	2.1122	5.20192e-24	Iron ion binding	2.07	3.01	2.62	12.76	12.56	11.21	0.00219411	Cytochrome P450
TEA020633.1	1.12341	1.78495e-09	Iron ion binding	3.31	2.76	2.37	6.5	6.66	5.93	0.00219411	Hypothetical protein
TEA020791.1	-1.59298	1.87647e-14	Iron ion binding	14.74	15.22	19.47	5.15	4.91	5.64	0.00219411	Geraniol 8-hydroxylase-like
TEA023047.1	1.13919	0.00584123	Iron ion binding	36.26	21.5	11.21	58.71	60.12	56.82	0.00219411	Cytochrome P450 93A3
TEA023937.1	-1.05068	1.9243e-07	Iron ion binding	89.8	88.95	118.89	47.88	47.52	45.79	0.00219411	Flavonol synthase/flavanone 3-hydroxylase
TEA025560.1	1.11245	0.00271355	Iron ion binding	38.7	33.94	14.8	72.06	71.49	68.1	0.00219411	Lj3g3v1475790.2
TEA026499.1	-1.24593	0.0441621	Iron ion binding	0.22	0.27	0.39	0	0.04	0.08	0.00219411	Hypothetical protein
TEA026878.1	1.48348	1.08246e-05	Iron ion binding	1	1.04	0.52	2.57	2.84	2.85	0.00219411	Taxadiene 5-alpha hydroxylase
TEA027518.1	-2.89105	3.8533e-71	Iron ion binding	125.5	109.89	98.98	16.02	12.44	14.05	0.00219411	Gibberellin 20 oxidase 1-like
TEA027891.1	1.13037	0.000384341	Iron ion binding	29.79	19.91	13.34	54.02	51.15	45.41	0.00219411	Ent-kaurenoic acid oxidase 1-like
TEA028270.1	1.02602	0.0380426	Iron ion binding	0.53	0.54	1.22	1.71	1.92	2.07	0.00219411	Cytochrome P450 714A1-like
TEA028658.1	2.44838	1.60186e-06	Iron ion binding	0	0	0	1.22	2.3	1.46	0.00219411	Cytochrome P450 98A2
TEA028665.1	2.74381	3.32653e-08	Iron ion binding	0	0	0	2.37	3.55	1.97	0.00219411	Cytochrome P450 98A2
TEA031406.1	1.57861	3.00241e-05	Iron ion binding	21.5	15.27	6.77	52.61	54.46	52.02	0.00219411	Cytochrome P450, family 722, subfamily A, polypeptide 1
TEA031672.1	1.16542	0.0382463	Iron ion binding	0.38	0.29	0.13	0.71	0.72	1.12	0.00219411	Gibberellin 2-oxidase
GO:0016758 transferase activity
TEA001239.1	-1.42098	1.59628e-07	Transferase activity, transferring hexosyl groups	21.32	17.73	12.04	5.57	6.88	5.18	0.00667381	Soyasaponin III rhamnosyltransferase-like
TEA002414.1	-1.75651	9.20167e-07	Transferase activity, transferring hexosyl groups	9.38	10.09	19.39	3.76	2.96	2.82	0.00667381	SORBIDRAFT_01g001220, Sb01g001220
TEA002417.1	-1.87044	1.07773e-08	Transferase activity, transferring hexosyl groups	8.49	12.81	14.45	3.22	3.08	1.96	0.00667381	Cyanohydrin beta-glucosyltransferase-like
TEA002418.1	-2.32901	5.65647e-09	Transferase activity, transferring hexosyl groups	5.11	7.58	3.1	0.87	0.6	0.58	0.00667381	SORBIDRAFT_01g001220, Sb01g001220
TEA005507.1	-1.19748	0.0116784	Transferase activity, transferring hexosyl groups	1.75	2.01	2.87	0.82	0.7	0.84	0.00667381	SORBIDRAFT_01g001220, Sb01g001220
TEA009309.1	1.68144	1.15924e-08	Transferase activity, transferring hexosyl groups	3.03	1.83	1.98	7.73	9.51	7.88	0.00667381	SORBIDRAFT_01g001220, Sb01g001220
TEA010880.1	-1.97781	2.33135e-06	Transferase activity, transferring hexosyl groups	4.22	1.74	2.43	0.32	0.58	0.56	0.00667381	Zeatin O-glucosyltransferase-like
TEA012394.1	-1.70185	0.00136819	Transferase activity, transferring hexosyl groups	0.49	0.41	1.06	0.08	0.1	0.11	0.00667381	Cytokinin-O-glucosyltransferase 2
TEA014953.1	1.41246	0.00680755	Transferase activity, transferring hexosyl groups	0.42	0.47	0.09	1.47	1.29	1.23	0.00667381	UGT72C1
TEA016859.1	1.45481	0.00564867	Transferase activity, transferring hexosyl groups	0.12	0.25	0.14	0.79	0.62	0.8	0.00667381	Cyanohydrin beta-glucosyltransferase-like
TEA026194.1	1.37176	4.30196e-06	Transferase activity, transferring hexosyl groups	27.88	20.7	12.54	58.1	60.89	55.94	0.00667381	Soyasaponin III rhamnosyltransferase-like
TEA026939.1	1.28196	0.0188477	Transferase activity, transferring hexosyl groups	5.28	2.06	0.77	8.42	10.52	9.96	0.00667381	SORBIDRAFT_01g001220, Sb01g001220
TEA027911.1	-1.22865	0.0103876	Transferase activity, transferring hexosyl groups	7.96	9.87	25.51	5.49	4.89	4.58	0.00667381	Hypothetical protein
GO:0055114 oxidation-reduction process (Biolgical process)
TEA011776.1	-1.12989	5.48796e-10	Oxidoreductase activity, acting on single donors with incorporation of molecular oxygen, incorporation of two atoms of oxygen	30.26	30.7	21.71	12.15	12.61	12.21	0.00699216	Lipoxygenase isoform 2
TEA017638.1	1.33205	0.0135368	Oxidoreductase activity, acting on single donors with incorporation of molecular oxygen, incorporation of two atoms of oxygen	10.11	10.49	1.48	28.03	27.58	27.51	0.00699216	Carotenoid cleavage dioxygenase 8 homolog B, chloroplastic
TEA024310.1	1.0782	2.55938e-08	Oxidoreductase activity, acting on single donors with incorporation of molecular oxygen, incorporation of two atoms of oxygen	6.22	7.53	5.27	13.21	14.82	13.71	0.00699216	Carotenoid 9,10(9',10')-cleavage dioxygenase
TEA025155.1	-1.27251	0.0378426	Oxidoreductase activity, acting on single donors with incorporation of molecular oxygen, incorporation of two atoms of oxygen	1.9	0.8	0.32	0.35	0.11	0.11	0.00699216	NCED1, NCED3
TEA028072.1	1.09087	0.00128716	Oxidoreductase activity, acting on single donors with incorporation of molecular oxygen, incorporation of two atoms of oxygen	2.02	1.16	2.18	4.07	4.45	4.18	0.00699216	Carotenoid 9,10(9',10')-cleavage dioxygenase
TEA030362.1	1.37193	0.0167315	Oxidoreductase activity, acting on single donors with incorporation of molecular oxygen, incorporation of two atoms of oxygen	0.13	0.04	0.13	0.69	0.45	0.32	0.00699216	Probable 9-cis-epoxycarotenoid dioxygenase NCED5, chloroplastic
GO:0016740 transferase activity
TEA001166.1	-1.4083	0.0146644	Transferase activity	0.48	0.93	0.04	0.04	0.01	0.02	0.0249184	Hypothetical protein
TEA001928.1	-3.1296	6.28946e-17	Transferase activity	5.6	3.45	3.97	0.43	0.14	0.29	0.0249184	Hypothetical protein
TEA002057.1	1.33828	0.0116624	Transferase activity	0.31	0.35	0.09	0.93	1.07	0.77	0.0249184	Shikimate O-hydroxycinnamoyltransferase-like
TEA003038.1	-4.02831	1.07454e-18	Transferase activity	25.04	36.4	94.32	0.55	0	0.37	0.0249184	HXXXD-type acyl-transferase family protein, putative
TEA003391.1	3.32445	4.74664e-24	Transferase activity	0.82	0.9	0.31	10.57	8.72	11.19	0.0249184	-
TEA004067.1	-1.36341	2.58321e-05	Transferase activity	4.26	4.9	7.31	2.08	1.78	1.94	0.0249184	-
TEA004178.1	5.66424	1.2379e-70	Transferase activity	0.41	0.8	0.06	46.49	44.16	47.1	0.0249184	POPTRDRAFT_573689
TEA004312.1	1.10248	0.000601561	Transferase activity	4.24	2.63	2.34	7.92	7.59	6.1	0.0249184	-
TEA006047.1	1.20894	5.69308e-05	Transferase activity	6.43	3.62	6.93	14.66	14.22	14.33	0.0249184	Probable LRR receptor-like serine/threonine-protein kinase At3g47570
TEA006701.1	-1.0233	3.58783e-07	Transferase activity	103.85	107.44	72.9	46.13	47.57	42.89	0.0249184	UDP-glucosyl transferase 74B1, putative
TEA006702.1	-1.03483	5.27934e-06	Transferase activity	10.49	13.03	8.94	4.78	5.06	5.53	0.0249184	UDP-glycosyltransferase 74G1-like
TEA006710.1	-1.87302	4.26132e-11	Transferase activity	3.33	3.19	3.5	0.71	0.72	0.99	0.0249184	UDP-glucosyl transferase 74B1, putative
TEA006928.1	-1.73132	2.88902e-05	Transferase activity	2.31	2.2	3.22	0.6	0.39	0.77	0.0249184	Spermine synthase
TEA008329.1	1.28478	0.028104	Transferase activity	0	0.02	0	0.12	0.19	0.28	0.0249184	LRR receptor-like serine/threonine-protein kinase EFR
TEA010118.1	1.60533	1.19973e-05	Transferase activity	3.58	3.27	1.34	11.07	9.49	9.68	0.0249184	POPTRDRAFT_857619
TEA010805.1	-1.37337	0.00294098	Transferase activity	1.69	1.43	0.69	0.42	0.34	0.37	0.0249184	BAHD acyltransferase DCR
TEA013905.1	-3.37342	1.36845e-13	Transferase activity	2.73	3.3	2.17	0	0	0.1	0.0249184	Uncharacterized LOC101296487
TEA014688.1	-2.20867	2.28823e-05	Transferase activity	0.72	0.76	0.76	0	0	0	0.0249184	ATP phosphoribosyltransferase 2, chloroplastic
TEA016790.1	-3.59012	8.00238e-15	Transferase activity	2.16	1.46	3.52	0	0.03	0	0.0249184	-
TEA017121.1	-1.89968	2.83684e-12	Transferase activity	85.83	125.07	156.27	27.3	32.44	28.67	0.0249184	Hypothetical protein
TEA019306.1	-2.65369	8.41852e-08	Transferase activity	1.24	1.22	1.02	0.04	0	0	0.0249184	Metal transporter Nramp4
TEA019377.1	1.00422	0.0178898	Transferase activity	3.97	2.22	1.46	6.38	5.46	5.55	0.0249184	Brassinosteroid-related acyltransferase 1
TEA021174.1	-2.12744	5.75896e-06	Transferase activity	0.87	1.05	1.22	0.18	0.05	0.14	0.0249184	Serine/threonine-protein kinase Nek2-like
TEA024390.1	-1.24903	0.0283303	Transferase activity	39.83	34.52	0.68	0.8	0.38	0.8	0.0249184	BAHD acyltransferase At5g47980-like
TEA024564.1	-1.94793	0.000240355	Transferase activity	0.57	0.46	1.44	0.09	0.02	0.08	0.0249184	Omega-hydroxypalmitate O-feruloyl transferase-like
TEA025747.1	1.15457	0.0242718	Transferase activity	1.36	2.09	0.5	4.3	3.57	3.44	0.0249184	Uncharacterized LOC103427988
TEA025852.1	-1.15396	0.0427043	Transferase activity	0.26	0.08	0.21	0	0	0	0.0249184	Cytosolic sulfotransferase 12-like
TEA029067.1	1.31188	0.00480069	Transferase activity	0.66	0.99	0.27	2.22	1.94	1.92	0.0249184	Hypothetical protein
TEA029098.1	2.20248	2.65261e-33	Transferase activity	2.89	2.87	2.45	12.24	13.13	15.33	0.0249184	Spermine synthase
TEA029613.1	-2.335	1.25786e-62	Transferase activity	93	102.31	84.17	18.21	19.04	16.5	0.0249184	Hypothetical protein
TEA029770.1	3.86095	6.36295e-37	Transferase activity	0.14	0.24	0.3	4.94	5.2	4.83	0.0249184	AAT3
